# Supplementary material
Source: PubMed Central journal article supplement (PMC3377948)

## **SUPPLEMENTAL MATERIAL:**

### ***PLA2G7* genotype, Lp-PLA2 activity and coronary heart disease risk in 10,494 cases and 15,624 controls of European ancestry**

Juan P. Casas MD PhD<sup>1, 2\*</sup>, Ewa Ninio PhD<sup>3</sup>, Andrie Panayiotou PhD<sup>4</sup>, Jutta Palmen MSc<sup>5</sup>, Jackie A Cooper MSc<sup>5</sup>, Sally L Ricketts PhD<sup>6</sup>, Reecha Sofat MRCP<sup>7</sup>, Andrew N Nicolaides, MS, FRCS<sup>4,8, 9</sup>, James P Corsetti MD<sup>10</sup>, F Gerry R Fowkes MBChB, PhD<sup>11</sup>, Ioanna Tzoulaki PhD<sup>12</sup>, Meena Kumari PhD<sup>2</sup>, Eric J Brunner PhD<sup>2</sup>, Mika Kivimaki PhD<sup>2</sup>, Michael G Marmot PhD MRCP<sup>2</sup>, Michael M Hoffmann PhD<sup>13</sup>, Karl Winkler MD<sup>13</sup>, Winfred März MD<sup>14</sup>, Shu Ye MD PhD<sup>15</sup>, Heide A Stirnadel PhD<sup>16</sup>, Kay-Tee Khaw MBBChir, FRCP<sup>7</sup>, Steve E Humphries PhD FRCP, FRCPATH<sup>5</sup>, Manjinder S Sandhu PhD<sup>6</sup>, Aroon D Hingorani PhD, FRCP<sup>2,7</sup> and Philippa J Talmud DSc, FRCPATH<sup>5</sup>

<sup>1</sup>Department of Epidemiology and Population Health, London School of Hygiene and Tropical Medicine, London, 2K

<sup>2</sup>Department of Epidemiology and Public Health, UCL, 1-19 Torrington Street, London WC1E 6BT

<sup>3</sup>INSERM UMRS937, UPMC Univ Paris 06 and Faculté de Médecine Pierre et Marie Curie, Paris, France

<sup>4</sup> Department of Biological Sciences, University of Cyprus, Nicosia Cyprus

<sup>5</sup>Division of Cardiovascular Genetics, Department of Medicine, University College London, 5 University St, London, UK

<sup>6</sup>Department of Public Health and Primary Care, Strangeways Research Laboratory, University of Cambridge, Cambridge, UK

<sup>7</sup>Centre for Clinical Pharmacology, British Heart Foundation Laboratories at UCL, London, UK

<sup>8</sup>The Cyprus Cardiovascular Disease Educational and Research Trust, Nicosia, Cyprus

<sup>9</sup>Department of Vascular Surgery, Imperial College, London, UK

<sup>10</sup>Department of Pathology and Laboratory Medicine, University of Rochester School of Medicine and Dentistry, Rochester, New York, USA.

<sup>11</sup>Centre for Population Health Sciences, University of Edinburgh, Teviot Place, Edinburgh, UK

<sup>12</sup>Division of Epidemiology, Public Health and Primary Care, Imperial College, St. Mary's Campus, London, UK

<sup>13</sup>Abteilung für Klinische Chemie, Innere Medizin, Universitätsklinikum Freiburg, Germany

<sup>14</sup>Synlab Medizinisches Versorgungszentrum für Labordiagnostik Heidelberg, Germany

<sup>15</sup>William Harvey Research Institute, Barts and The London School of Medicine and Dentistry, Queen Mary University of London, London, UK

<sup>16</sup> Worldwide Epidemiology, GlaxoSmithKline R&D, Harlow, UK

## Supplemental methods

### ***Lp-PLA2 activity, cardiovascular traits and risk of coronary heart disease***

To evaluate the associations of Lp-PLA2 activity with cardiovascular traits, quartiles of log-Lp-PLA2 activity were generated within NPHS-II and EPIC-Norfolk, and the unadjusted mean with its respective standard deviations were obtained for the following cardiovascular traits: age (years), body mass index (kg/m<sup>2</sup>), systolic blood pressure (mm Hg), total-cholesterol (mmol/L), LDL cholesterol (mmol/L), HDL-cholesterol (mmol/L), log-triglycerides (mmol/L), log-C-reactive protein (mg/dL) and alcohol consumption (units/week). Then using the bottom quartile (Q1) as the reference category, mean difference for each quartile was obtained and results were pooled across studies using random model effects. For these associations, only individuals without known coronary heart disease at the time of measuring the Lp-PLA2 activity were included, to reduce possible reverse causation.

Association between Lp-PLA2 activity and incident coronary heart disease was assessed using Cox proportional hazards regression. Hazard ratios and 95% confidence intervals (CI) were obtained for each quartile, using the bottom quartile as the reference group within the NPHS-II and EPIC-Norfolk studies. Then hazard ratios (and ORs for EPIC-Norfolk) and their 95%CI for each quartile were pooled across the two studies to obtain a summary effect for each quartile. A progressive adjustment for potential confounders were conducted as follows: model-1 includes age (continuous), gender and practice (for NPHS-II) and enrolment date (for EPIC); model-2: adjusted for variables in previous model-1 plus body mass index (continuous), smoking (current-ex vs. never), diabetes (yes vs. no), systolic blood pressure (continuous), C-reactive protein (continuous), fibrinogen (continuous), alcohol (continuous as: units/week). Model 3: Adjusted for variables in model-2 plus: total-cholesterol (continuous), triglycerides (continuous) Apo-A1 (continuous), Apo-B

(continuous). If Apo-A1 was not available HDL-cholesterol (continuous) was used. Similarly, if Apo-B was not available LDL-cholesterol (continuous) was used.

### ***PLA2G7 gene variants and Lp-PLA2 activity levels***

To evaluate the effect of the different *PLA2G7* variants on levels of Lp-PLA2 activity, 6094 individuals from 7 studies with available DNA and Lp-PLA2 activity levels were studied; See Supplementary Table 1. The unadjusted mean values of the log-Lp-PLA2 activity with its respective standard deviation were obtained for each genotype from the seven *PLA2G7* variants. Mean differences in log-Lp-PLA2 (log-ratio) for each genotype were obtained and results were pooled across studies using random model effects.

### ***PLA2G7 gene variants and cardiovascular traits***

From the previous analyses, the gene-variant exhibiting the largest genotype effect on the Lp-PLA2 activity was then used as proxy of the likely effect on cardiovascular traits to be observed when using an Lp-PLA2 inhibitor in a clinical trial (i.e. darapladib). Such effect is expected to be proportional to the magnitude of the effect that the gene-variant exhibit on the Lp-PLA2 activity levels. For this, unadjusted mean values of cardiovascular traits with their respective standard deviations were obtained for each genotype. Mean differences in the cardiovascular traits for each genotype were calculated and then data were pooled across studies using random effect models. For cohort studies with repeated measures of some continuous traits, the baseline or first available measure (in the case of missing data) was utilized. Cardiovascular traits included here are those evaluated in the observational component, in order to allow a more like-with-like comparison.

### ***PLA2G7 gene variants and risk of coronary heart disease***

To evaluate the effect of the PLA2G7 variants on the risk of coronary heart disease, a total of 9 studies including up to 8506 cases were used. For each gene-variant, using individuals homozygous for the common allele as the reference group a measure of association was obtained for each genotype comparison. Specifically, log-odds ratio and its standard error for case-control studies and log-hazard ratio with its standard error for cohort studies were obtained for each genotype comparison from each gene-variant analysed. All measures of effect were adjusted by age (continuous), and gender. Enrolment date or practice centre were also included if relevant to each study. Assuming equivalence of log-odds ratio with log-hazard ratios, these measures of effect were then pooled across studies using random effect models, from now on this will be referred to as odds ratios. Initially, pooled odds ratios were obtained separately according to the outcome reported; coronary artery disease (determined by coronary angiography) vs. coronary heart disease. If no evidence of heterogeneity was observed between the groups a summary odds ratio was then calculated.

**Supplemental Table 1.** Details of the 12 studies used in the current analysis

| Study Name   | Study Design<br>(location)                                                                                            | Sampling frame                                                                                     | Main selection criteria                                                                                                                                                                                                                                                                                                                   | Primary analysis                            |                                          |                                    |
|--------------|-----------------------------------------------------------------------------------------------------------------------|----------------------------------------------------------------------------------------------------|-------------------------------------------------------------------------------------------------------------------------------------------------------------------------------------------------------------------------------------------------------------------------------------------------------------------------------------------|---------------------------------------------|------------------------------------------|------------------------------------|
|              |                                                                                                                       |                                                                                                    |                                                                                                                                                                                                                                                                                                                                           | Genotype &<br>LpPLA2 level<br>(No subjects) | Genotype &<br>CV Traits<br>(No subjects) | Genotype &<br>CHD<br>(No subjects) |
| NPHS-II      | Population-based<br>Prospective Cohort<br>(United Kingdom)                                                            | All men aged between<br>50 to 63 years<br>registered with 9<br>primary care practices.             | Individuals were excluded if had:<br>Pre-existing cardiovascular<br>disease (CHD or stroke), Coronary<br>surgery or malignant disease, or were<br>taking Aspirin or anticoagulant .                                                                                                                                                       | Yes<br>(2099)                               | Yes<br>(2386)                            | Yes<br>(2706)                      |
| EPIC-Norfolk | population-based<br>Prospective cohort:<br>a nested case-control<br>was used for this<br>analysis<br>(United Kingdom) | All men and women<br>aged between 40 and<br>79 years registered in<br>primary care practices.      | Participants with prevalent CHD or<br>stroke were excluded. CHD is<br>defined as ICD9 410-414 or ICD10<br>I20-I25. Controls were study<br>participants who remained free of any<br>cardiovascular disease during follow-<br>up and were matched to each case<br>by sex, age (within 5 years), and time<br>of enrolment (within 3 months). | Yes<br>(1485 controls)                      | Yes<br>(1969 controls)                   | Yes<br>(4350)                      |
| CYPRUS       | Prospective cohort<br>(Cyprus)                                                                                        | All men and women ><br>40 years identified<br>through the population<br>list at the Mayor's office | To be included subjects had to be<br>inhabitants from Pedoulas or Nissou<br>villages in Cyprus or their relatives<br>living in major cities.                                                                                                                                                                                              | Yes<br>(633)                                | Yes<br>(638)                             | Yes<br>(731)                       |
| HIFMECH      | Case-control<br>(UK, Sweden, France,<br>Italy)                                                                        | Cases: male MI<br>survivors.<br>Controls: men matched<br>by age and regional<br>areas.             | Subjects with Familial<br>hypercholesterolaemia, or Insulin-<br>dependent diabetes mellitus were<br>excluded.                                                                                                                                                                                                                             | No                                          | Yes (565<br>controls)                    | Yes<br>(1093)                      |
| THROMBO      | Prospective cohort<br>(United States of<br>America)                                                                   | Consecutive series of<br>post-infarction subjects                                                  | Individuals with diabetes were<br>excluded.                                                                                                                                                                                                                                                                                               | Yes<br>(524)                                | Yes<br>(530)                             | No                                 |

| Study Name                                                                       | Study Design<br>(Location)                                     | Sampling frame                                                                                                                                                                                   | Main selection criteria                                                                                                                                                                                                                                                            | Primary analysis                            |                                          |                                    |
|----------------------------------------------------------------------------------|----------------------------------------------------------------|--------------------------------------------------------------------------------------------------------------------------------------------------------------------------------------------------|------------------------------------------------------------------------------------------------------------------------------------------------------------------------------------------------------------------------------------------------------------------------------------|---------------------------------------------|------------------------------------------|------------------------------------|
|                                                                                  |                                                                |                                                                                                                                                                                                  |                                                                                                                                                                                                                                                                                    | Genotype &<br>LpPLA2 level<br>(No subjects) | Genotype &<br>CV Traits<br>(No subjects) | Genotype &<br>CHD<br>(No subjects) |
| AtheroGene                                                                       | Case-control<br>(Germany)                                      | Cases: patients with stable angina attending for diagnostic coronary angiography<br>Controls : men and women recruited either from GP's offices (routine check-up) or by newspaper announcement  | Cases were excluded if there was evidence of significant co-morbidities: valvular heart disease, cardiomyopathy, malignant disease or febrile condition.<br><br>Controls: individuals with evidence, from the interview, on atherosclerosis or with pathological ECG were excluded | Yes<br>(468 controls)                       | Yes<br>(484 controls)                    | Yes<br>(1304)                      |
| Whitehall-II                                                                     | Prospective cohort<br>(United Kingdom)                         | All civil servants in 20 departments at Whitehall                                                                                                                                                | To be included individuals had to have a job-contract in a London-based civil service department                                                                                                                                                                                   | No                                          | Yes<br>(5154)                            | Yes<br>(5611)                      |
| UDACS                                                                            | Case-control<br>(United Kingdom)                               | Consecutive subjects recruited to diabetic clinic<br>Cases: men and women with diabetes and cardiovascular disease.<br>Controls: men and women with diabetes but without cardiovascular disease. | To be included individuals had to have T2DM according to WHO criteria                                                                                                                                                                                                              | Yes<br>(235 controls)                       | Yes<br>(194 controls)                    | No                                 |
| Southampton Atherosclerosis Study                                                | Collection of cases with coronary stenosis<br>(United Kingdom) | Consecutive patients undertaking diagnostic and interventional coronary angiography                                                                                                              | N/A                                                                                                                                                                                                                                                                                | No                                          | No                                       | Yes<br>(1091)                      |
| LURIC                                                                            | Case-control<br>(Germany)                                      | Men and women hospitalized for coronary angiography.                                                                                                                                             | N/A                                                                                                                                                                                                                                                                                | Yes<br>(728 controls)                       | Yes<br>(730 controls)                    | Yes<br>(2581)                      |
| Edinburgh Artery Study                                                           | Population-based prospective cohort<br>(United Kingdom)        | A random sample stratified by age and selected from 10 general practises throughout the city of Edinburgh.                                                                                       | Subjects were excluded if they were unfit to participate (e.g. due to mental illness)                                                                                                                                                                                              | No                                          | Yes<br>(894)                             | Yes<br>(895)                       |
| WTCCC1 CHD Cases and joint National Blood Service and 1958 Birth Cohort Controls | Case Control<br>(United Kingdom)                               | Recruitment of cases on a national basis by direct approach to public via media or mailing family physicians with                                                                                | CAD cases with validated history of either MI or coronary revascularisation (CABG or PCA) under the age of 66, verified through hospital or primary care physician records                                                                                                         | No                                          | No                                       | Yes<br>(4992)                      |

**Supplemental Table 2.** List of tagging-SNPs within the *PLA2G7* gene evaluated in the NPHS-II study. 11= Homozygous for the common allele. 12= Heterozygous and 22 = Homozygous for the rare allele. Minor and major alleles are described in supplementary methods.

|                   | genotype | N    | Mean Lp-PLA2 | Standard deviation | N    | P value (additive) |
|-------------------|----------|------|--------------|--------------------|------|--------------------|
| <b>rs974670</b>   | 11       | 637  | 48.06        | 15.73              | 637  | 0.237619           |
|                   | 12       | 862  | 48.66        | 16.03              | 862  |                    |
|                   | 22       | 309  | 49.32        | 15.31              | 309  |                    |
| <b>rs1051931</b>  | 11       | 1195 | 48.1         | 15.07              | 1195 | 0.044157           |
|                   | 12       | 550  | 49.16        | 16.72              | 550  |                    |
|                   | 22       | 64   | 51.83        | 20.61              | 64   |                    |
| <b>rs2216465</b>  | 11       | 806  | 49.32        | 16.73              | 806  | 0.009986           |
|                   | 12       | 800  | 48.48        | 15.24              | 800  |                    |
|                   | 22       | 201  | 45.89        | 13.77              | 201  |                    |
| <b>rs1805018</b>  | 11       | 1592 | 48.72        | 15.95              | 1592 | 0.313898           |
|                   | 12       | 82   | 46.61        | 13.53              | 82   |                    |
|                   | 22       | 1    | 60.37        |                    | 1    |                    |
| <b>rs17288905</b> | 11       | 1569 | 48.43        | 15.48              | 1569 | 0.906231           |
|                   | 12       | 229  | 49.36        | 17.81              | 229  |                    |
| <b>rs16874962</b> | 11       | 1593 | 48.56        | 15.78              | 1593 | 0.220458           |
|                   | 12       | 210  | 48.53        | 16.07              | 210  |                    |
|                   | 22       | 6    | 46.63        | 16.46              | 6    |                    |
| <b>rs12195701</b> | 11       | 1117 | 48.84        | 16.13              | 1117 | 0.138449           |
|                   | 12       | 610  | 48.28        | 15.52              | 610  |                    |
|                   | 22       | 82   | 46.67        | 13.31              | 82   |                    |
| <b>rs10948300</b> | 11       | 1097 | 48.92        | 16.16              | 1097 | 0.683216           |
|                   | 12       | 624  | 48.27        | 15.39              | 624  |                    |
|                   | 22       | 87   | 46.33        | 13.72              | 87   |                    |
| <b>rs12528807</b> | 11       | 1524 | 48.61        | 16.09              | 1524 | 0.557218           |
|                   | 12       | 274  | 48.31        | 14.31              | 274  |                    |
|                   | 22       | 11   | 46.8         | 12.24              | 11   |                    |
| <b>rs1421368</b>  | 11       | 1466 | 48.48        | 15.64              | 1466 | 0.008984           |
|                   | 12       | 329  | 48.89        | 16.52              | 329  |                    |
|                   | 22       | 13   | 50.9         | 13.36              | 13   |                    |
| <b>rs1421378</b>  | 11       | 647  | 49.68        | 16.3               | 647  | 0.008984           |
|                   | 12       | 873  | 48.32        | 15.5               | 873  |                    |
|                   | 22       | 287  | 46.86        | 15.38              | 287  |                    |



**Supplementary Table 3.** Numbers of individuals included from each study for the gene-traits associations.

| rs_number         | NPHS-II | UDACS | EPIC-Norfolk | THROMBO | Cyprus | Atherogene | LURIC | WH-II | HIFMECH | EAS |
|-------------------|---------|-------|--------------|---------|--------|------------|-------|-------|---------|-----|
| <b>rs974670</b>   |         |       |              |         |        |            |       |       |         |     |
| LP-PLA2 activity  | 2099    | 231   |              | 522     | 633    | 458        |       |       |         |     |
| <b>rs1805017</b>  |         |       |              |         |        |            |       |       |         |     |
| LP-PLA2 activity  | 2085    | 235   | 1479         | 471     | 628    | 468        | 728   |       |         |     |
| <b>rs9381475</b>  |         |       |              |         |        |            |       |       |         |     |
| LP-PLA2 activity  | 2080    | 230   | 1477         | 474     | 625    | 464        |       |       |         |     |
| <b>rs10948300</b> |         |       |              |         |        |            |       |       |         |     |
| LP-PLA2 activity  | 1808    | 188   | 1477         |         |        |            |       |       |         |     |
| <b>rs2216465</b>  |         |       |              |         |        |            |       |       |         |     |
| LP-PLA2 activity  | 1807    | 188   | 1476         |         |        |            |       |       |         |     |
| <b>rs1421378</b>  |         |       |              |         |        |            |       |       |         |     |
| LP-PLA2 activity  | 1807    | 231   | 1485         | 520     | 631    | 467        |       |       |         |     |
| <b>rs1051931</b>  |         |       |              |         |        |            |       |       |         |     |
| Age               | 2386    | 194   | 1969         | 530     | 638    | 484        | 730   | 5154  | 565     | 894 |
| LP-PLA2 activity  | 1809    | 188   | 1453         | 524     | 632    | 468        | 727   |       |         |     |
| BMI               | 2383    | 191   | 1969         | 530     | 638    | 484        | 730   | 5146  | 566     | 894 |
| Systolic BP       | 2384    | 193   | 1969         |         | 623    |            |       | 5147  | 564     | 893 |
| Total-cholesterol | 2371    | 192   | 1969         |         | 638    | 484        |       | 5129  | 547     | 893 |
| LDL               | 1533    | 186   | 1969         |         | 638    | 484        |       | 4693  |         | 888 |
| Apo-B             | 2072    |       | 1272         | 511     | 638    | 244        |       |       | 547     |     |
| HDL               | 1619    | 192   | 1969         |         | 638    | 484        |       | 4765  |         | 888 |
| Apo-A             | 2072    |       | 1200         | 522     | 638    | 244        |       |       |         |     |
| Log-TGL           | 2373    | 192   | 1969         |         | 638    |            |       | 4782  | 547     | 893 |
| Log-CRP           | 2000    | 194   | 1348         | 491     | 609    | 327        |       | 4529  | 544     | 603 |
| Fibrinogen        | 2377    |       | 1880         | 529     | 614    | 244        |       | 4484  | 527     | 875 |
| Alcohol           | 2386    |       | 1969         |         | 637    |            |       |       | 555     |     |

**Supplementary Table 4.** Summary hazard ratio (HR) of coronary heart disease risk by quartiles of Lp-PLA2 activity in NPHS-II and EPIC-Norfolk, according to different levels of adjustment.

|                   | <b>Model-1</b>               | <b>Model-2</b>               | <b>Model-3</b>               |
|-------------------|------------------------------|------------------------------|------------------------------|
| <b>Comparison</b> | <b>Hazard ratio (95% CI)</b> | <b>Hazard ratio (95% CI)</b> | <b>Hazard ratio (95% CI)</b> |
| Q1                | Reference                    | Reference                    | Reference                    |
| Q2                | 1.31 (1.06, 1.63)            | 1.33 (1.05, 1.67)            | 1.23 (0.97, 1.57)            |
| Q3                | 1.46 (1.18, 1.80)            | 1.44 (1.14, 1.81)            | 1.18 (0.92, 1.50)            |
| Q4                | 1.61 (1.31, 1.99)            | 1.56 (1.24, 1.96)            | 1.17 (0.91, 1.51)            |

Variables included in the different models were as follows. Model-1 includes age, sex, enrolment date & practice. Model-2 includes variables from Model-1 plus BMI, smoking, diabetes, systolic BP, CRP, fibrinogen & alcohol. Model-3 includes variable from model-2 plus total-cholesterol, triglycerides, Apo-A & Apo-B.

## Supplemental Figure 1

Haploview map of PLA2G7 and the tSNPs used to genotype NPHS-II. Those boxed were included in the list of SNPs used to genotype the other studies.

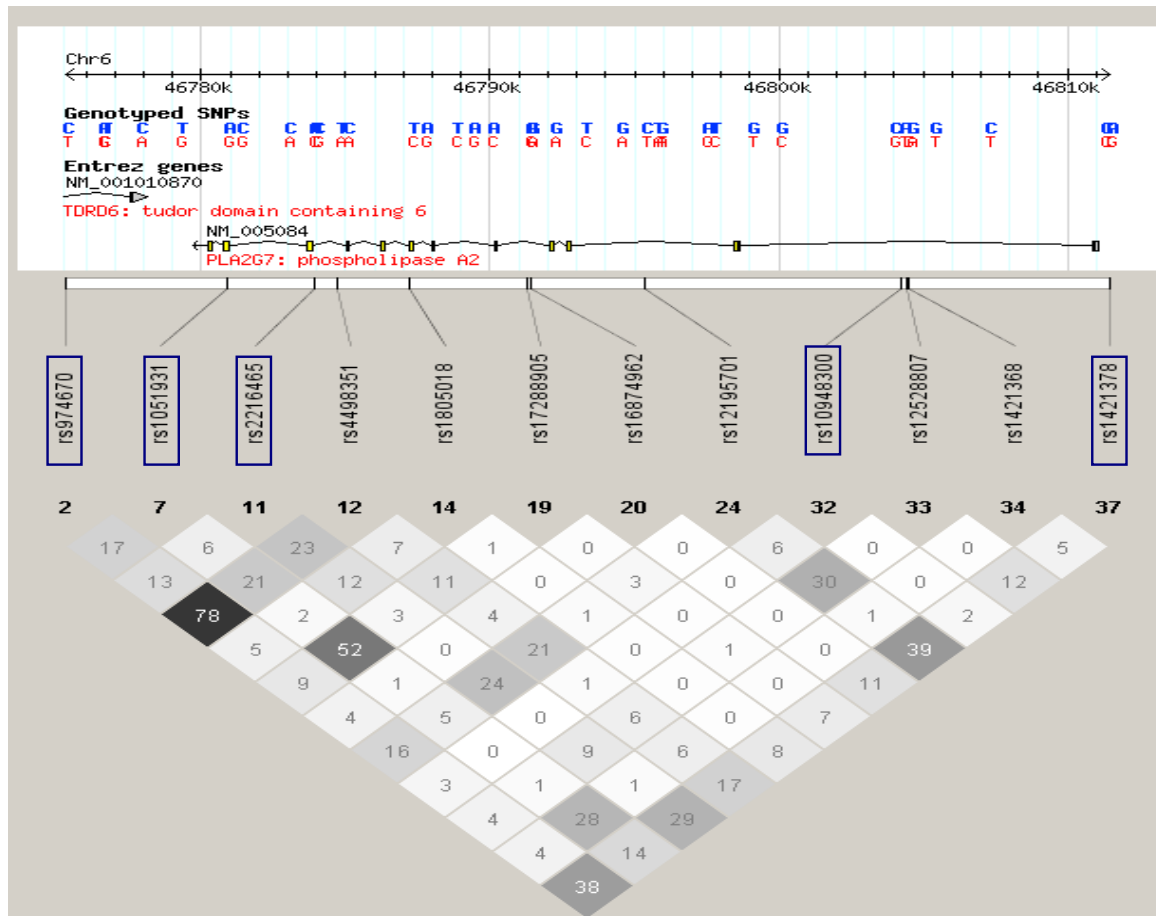

Supplement: NIHMS36003-supplement-Supp1.pdf [file NIHMS36003-supplement-Supp1.pdf]
